# Supplementary material for: Gold nanorods derivatized with CTAB and hydroquinone or ascorbic acid: spectroscopic investigation of anisotropic nanoparticles of different shapes and sizes
Source: Royal Society of Chemistry journal article supplement (doi:10.1039/d3na00356f), 2023-01-01

## **Gold Nanorods Derivatized with CTAB and Hydroquinone or Ascorbic Acid: Spectroscopic Investigation of Anisotropic Nanoparticles of Different Shape and Size**

Simone Amatori,<sup>a</sup> Alberto Lopez,<sup>a</sup> Carlo Meneghini,<sup>a</sup> Annarica Calcabrini<sup>b</sup>, Marisa Colone<sup>b</sup>, Annarita Stringaro<sup>b</sup>, Sofia Migani,<sup>b</sup> Ivan Khalakhan<sup>c</sup>, Giovanna Iucci,<sup>a</sup> Iole Venditti<sup>a</sup> and Chiara Battocchio<sup>\*a</sup>

### **SUPPLEMENTARY INFORMATION**

**Table S1.** Experimental conditions and plasmonic peaks for AuNRs. [AgNO<sub>3</sub>] = 0.004 M, [CTAB] = 0.2 M, [AA] = 0.078 M, [HQ] = 0.1 M and [HAuCl<sub>4</sub>] = 0.001 M.

\*Conditions of samples used for spectroscopic characterizations in this work

| ID | AgNO <sub>3</sub> (mL) | Seed solution (mL) | Reducing agent (mL) | [HAuCl <sub>4</sub> ] (mL) | CTAB (mL) | Plasmonic peaks (nm) | Size Ratios (with statistics from TEM measurements) |
|----|------------------------|--------------------|---------------------|----------------------------|-----------|----------------------|-----------------------------------------------------|
| A  | 0.4                    | 0.024              | AA, 0.14            | 5                          | 10        | 514-721              | L = 44 ± 9 nm; W = 12 ± 8 nm;<br>size ratio = 3.6   |
| B  | 0.4                    | 0.024              | AA, 0.14            | 5                          | 5         | 511-763              | L = 42 ± 9 nm; W = 10 ± 3 nm;<br>size ratio = 4.2   |
| C* | 0.4                    | 0.024              | AA, 0.07            | 5                          | 5         | 511-768              | L = 40 ± 6 nm, W = 10 ± 2 nm;<br>size ratio = 4.0   |
| D  | 0.4                    | 0.024              | HQ, 0.5             | 5                          | 5         | 535-648              | L = 95 ± 9 nm; W = 14 ± 9 nm;<br>size ratio = 6.0   |
| E  | 0.2                    | 0.160              | HQ, 0,5             | 5                          | 5         | 536-703-997          | L = 113 ± 9 nm; W = 15 ± 9 nm;<br>size ratio = 7,5  |
| F* | 0.1                    | 0.160              | HQ, 0,5             | 5                          | 5         | 535-720-1086         | L = 100 ± 8 nm; W = 14 ± 4 nm<br>size ratio = 7.1   |

**Table S2.** XPS results collected on AuNRs-AA and AuNRs-HQ (BE, FWHM, Atomic Percentage values and proposed assignments).

| Sample                                                                                          | Signal | BE (eV)                                                               | FWHM (eV) | Atomic Percentage (%)                                                 | Assignment                                  |
|-------------------------------------------------------------------------------------------------|--------|-----------------------------------------------------------------------|-----------|-----------------------------------------------------------------------|---------------------------------------------|
| AuNRs-AA<br>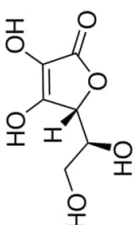   | C1s    | 285.00                                                                | 1.34      | 86                                                                    | C-C                                         |
|                                                                                                 |        | 286.35                                                                |           | 8                                                                     | C-N/C-O CTAB+AA                             |
|                                                                                                 |        | 287.78                                                                |           | 4                                                                     | C=O AA+impurities                           |
|                                                                                                 |        | 289.15                                                                |           | 2                                                                     | COOH impurities                             |
|                                                                                                 | N1s    | 398.93                                                                | 1.68      | 12                                                                    | C-N CTAB – AA electrostatic interactions    |
| 400.03                                                                                          | 26     | -N <sup>+</sup> terminal in “external” CTAB                           |           |                                                                       |                                             |
| 402.87                                                                                          | 62     | -N <sup>+</sup> in Ag(I) – Br <sup>-</sup> – CTA <sup>+</sup> complex |           |                                                                       |                                             |
| Br3d <sub>5/2</sub>                                                                             | 68.22  | 1.20                                                                  | 71        | Br <sup>-</sup> counterions of CTAB                                   |                                             |
|                                                                                                 | 69.25  |                                                                       | 23        | Br <sup>-</sup> in Ag(I) – Br <sup>-</sup> – CTA <sup>+</sup> complex |                                             |
|                                                                                                 | 71.21  |                                                                       | 6         | R-Br                                                                  |                                             |
| Ag3d <sub>5/2</sub>                                                                             | 367.32 | 0.56                                                                  | 88        | Ag(I)                                                                 |                                             |
|                                                                                                 | 368.07 |                                                                       | 12        | Ag(0)                                                                 |                                             |
| Au4f                                                                                            | 83.70  | 0.47                                                                  | 90        | Au(0)                                                                 |                                             |
|                                                                                                 | 84.27  |                                                                       | 10        | Au <sup>δ+</sup>                                                      |                                             |
| AuNRs-HQ<br> | C1s    | 285.00                                                                | 1.20      | 85                                                                    | C-C alifatic + aromatic                     |
|                                                                                                 |        | 286.87                                                                |           | 12                                                                    | C-N/C-O CTAB+HQ                             |
|                                                                                                 |        | 288.12                                                                |           | 2                                                                     | C=O impurities                              |
|                                                                                                 |        | 288.84                                                                |           | 1                                                                     | COOH impurities                             |
|                                                                                                 | N1s    | 399.60                                                                | 1.62      | 42                                                                    | -N <sup>+</sup> terminal in “external” CTAB |
| 402.80                                                                                          | 58     | -N <sup>+</sup> in Ag(I) – Br <sup>-</sup> – CTA <sup>+</sup> complex |           |                                                                       |                                             |
| Br3d <sub>5/2</sub>                                                                             | 68.11  | 1.21                                                                  | 62        | Br <sup>-</sup> counterions of CTAB                                   |                                             |
|                                                                                                 | 69.22  |                                                                       | 34        | Br <sup>-</sup> in Ag(I) – Br <sup>-</sup> – CTA <sup>+</sup> complex |                                             |
|                                                                                                 | 70.97  |                                                                       | 4         | R-Br                                                                  |                                             |
| Ag3d <sub>5/2</sub>                                                                             | 367.25 | 0.58                                                                  | 96        | Ag(I)                                                                 |                                             |
|                                                                                                 | 367.85 |                                                                       | 4         | Ag(0)                                                                 |                                             |
| Au4f                                                                                            | 83.11  | 0.46                                                                  | 82        | Au(0)                                                                 |                                             |
|                                                                                                 | 83.71  |                                                                       | 18        | Au <sup>δ+</sup>                                                      |                                             |

**Figure S1.** EDX data collected on a) AuNRs-HQ; b) AuNRs-AA

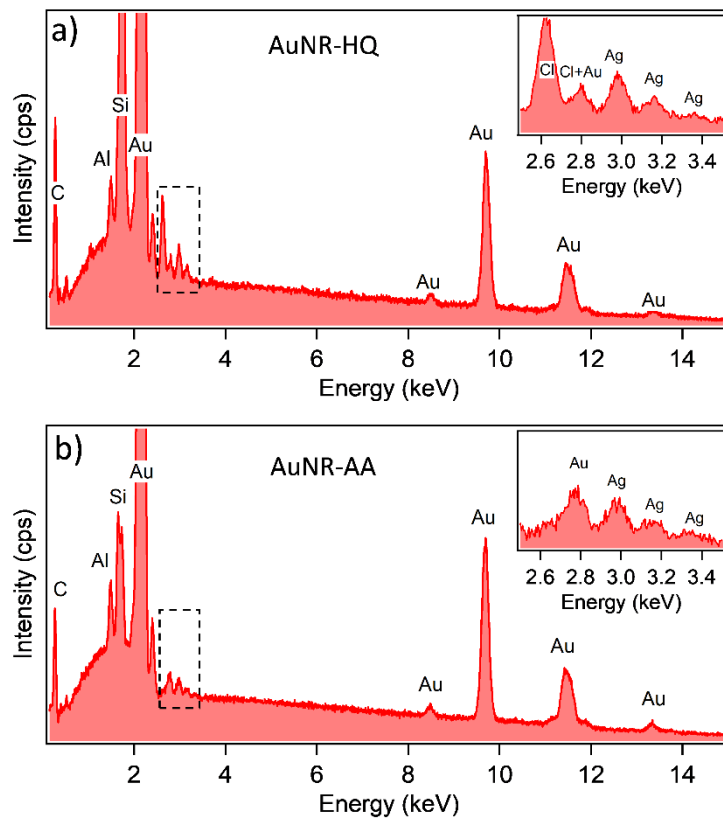

**Figure S2.** XPS spectra collected at C1s core-level on AuNRs-HQ and AuNRs-AA. C1s spectra of AuNRs-AA (a) and AuNRs-HQ (b) appear composite and at least four components can be individuated by following a peak-fitting procedure: the peak at lower BE (285.0 eV) is due to aliphatic C-C groups of CTAB and AA or, for AuNRs-HQ, C-C of CTAB superimposed to aromatic C of hydroquinone; the peaks at about 286.5 eV are due to C-N (CTAB) and C-O (AA, HQ) signals, that are impossible to deconvolute with the used resolution. The component at 287.8 eV in AuNRs-AA is attributed to the C=O functional group of AA, with a contribution attributed to adventitious carbon ( $C_{adv} = O$ ) or amide groups arising by contaminants usually observed in samples prepared in wet environment, as also reported in the literature for CTAB-stabilized AuNRs [17: C. Oliveira et al., *J. materials res. technol.*, 2021, **15**, 768-776]. For AuNRs-HQ the entire 288eV spectral component arises from such impurities. Finally, the signal of extremely low intensity observed in both samples at 289.2 eV is due to carboxylic groups of contaminants ( $C_{adv}OOH$ ), coherently with similar systems [26: V. Secchi et al., *ACS Biomater. Sci. Eng.*, 2019, **5**, 2190–2199.].

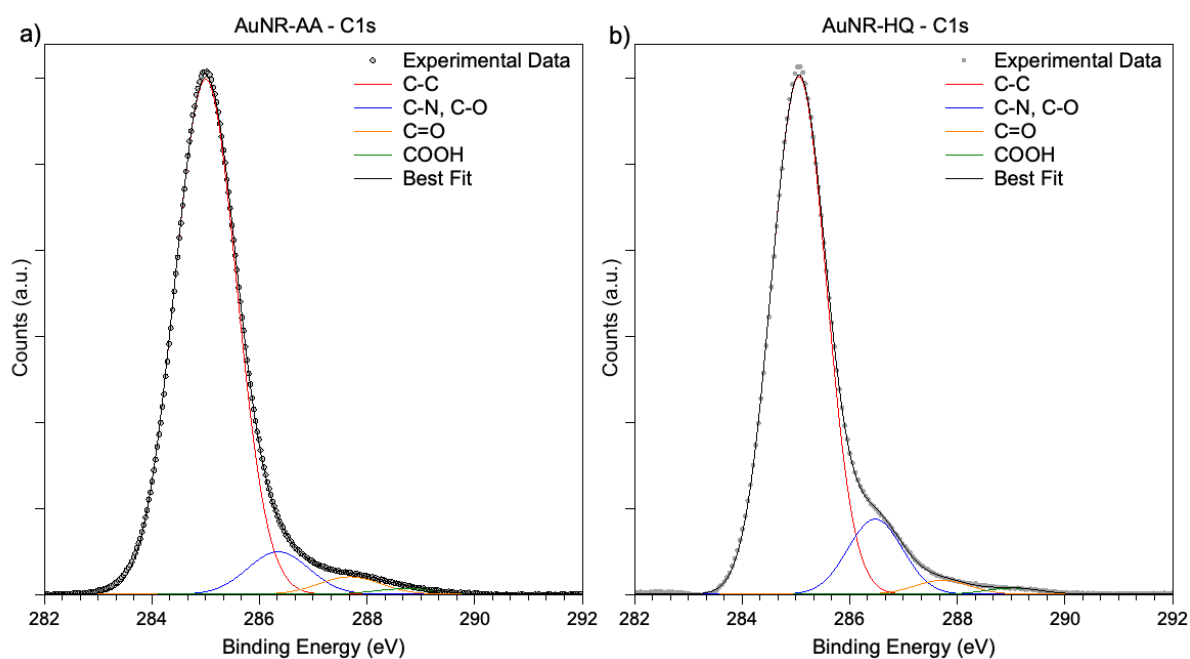

Supplement: d3na00356f1.pdf [file d3na00356f1.pdf]
